# Supplementary material for: Density functional theory studies of boron clusters with exotic properties in bonding, aromaticity and reactivity
Source: Royal Society of Chemistry journal article supplement (doi:10.1039/d1cp02516c), 2021-01-01
Supplement: d1cp02516c1.pdf [file d1cp02516c1.pdf]

## Density Functional Theory Studies of Boron Clusters with Exotic Properties in Bonding, Aromaticity and Reactivity

Dongbo Zhao,<sup>1</sup> Xin He,<sup>2</sup> Meng Li,<sup>2</sup> Bin Wang,<sup>2</sup> Chunna Guo,<sup>2</sup> Chunying Rong,<sup>2</sup> Pratim K.  
Chattaraj,<sup>3</sup> and Shubin Liu<sup>4,5</sup>

<sup>1</sup> *Institute of Biomedical Research, Yunnan University,  
Chenggong District, Kunming 650500, Yunnan, P.R. China.  
E-mail: dongbo@ynu.edu.cn*

<sup>2</sup> *Key Laboratory of Chemical Biology and Traditional Chinese Medicine Research  
(Ministry of Education of China), Hunan Normal University,  
Changsha, Hunan 410081, P.R. China  
E-mail: rongchunying@aliyun.com*

<sup>3</sup> *Department of Chemistry, Indian Institute of Technology, Kharagpur 721302, India. E-mail:  
pkc@chem.iitkgp.ac.in*

<sup>4</sup> *Research Computing Center, University of North Carolina, Chapel Hill, North Carolina 27599-  
3420, USA. E-mail: shubin@email.unc.edu*

<sup>5</sup> *Department of Chemistry, University of North Carolina, Chapel Hill, North Carolina, 27599-  
3290, USA*

1. Table S1, Cartesian coordinates of the 6 isomers of B<sub>4</sub> cluster
2. Figure S1, ELF isosurfaces for the 6 isomers

**Table S1.** Cartesian coordinates for isomers 1 to 6

---

---

|          |             |             |             |
|----------|-------------|-------------|-------------|
| isomer 1 |             |             |             |
| B        | 0.00000000  | -1.19554720 | -0.00000219 |
| B        | 0.00000000  | 0.00000000  | 0.94309635  |
| B        | -0.00000000 | -0.00000000 | -0.94309197 |
| B        | 0.00000000  | 1.19554720  | -0.00000219 |
| isomer 2 |             |             |             |
| B        | 0.00000000  | 1.08609008  | -0.00000000 |
| B        | 1.08609008  | -0.00000000 | -0.00000000 |
| B        | -1.08609008 | 0.00000000  | -0.00000000 |
| B        | -0.00000000 | -1.08609008 | -0.00000000 |
| isomer 3 |             |             |             |
| B        | -0.00000000 | -0.00000000 | 1.96655514  |
| B        | -0.00000000 | -0.00000000 | 0.25876302  |
| B        | 0.00000000  | 0.75460105  | -1.11265908 |
| B        | -0.00000000 | -0.75460105 | -1.11265908 |
| isomer 4 |             |             |             |
| B        | -0.59159804 | -2.13970015 | 0.00000000  |
| B        | -0.62615304 | -0.54919604 | 0.00000000  |
| B        | 1.21775109  | 1.85641413  | 0.00000000  |
| B        | 0.00000000  | 0.83248206  | 0.00000000  |
| isomer 5 |             |             |             |
| B        | 0.00000000  | 0.00000000  | 0.74354905  |
| B        | 0.00000000  | 0.00000000  | 2.31105217  |
| B        | 0.00000000  | 0.00000000  | -0.74354905 |
| B        | 0.00000000  | 0.00000000  | -2.31105217 |
| isomer 6 |             |             |             |
| B        | 0.00000000  | 0.00000000  | 2.28372133  |
| B        | 0.00000000  | 0.00000000  | 0.83938412  |
| B        | 0.00000000  | 0.00000000  | -2.28372133 |
| B        | 0.00000000  | 0.00000000  | -0.83938412 |

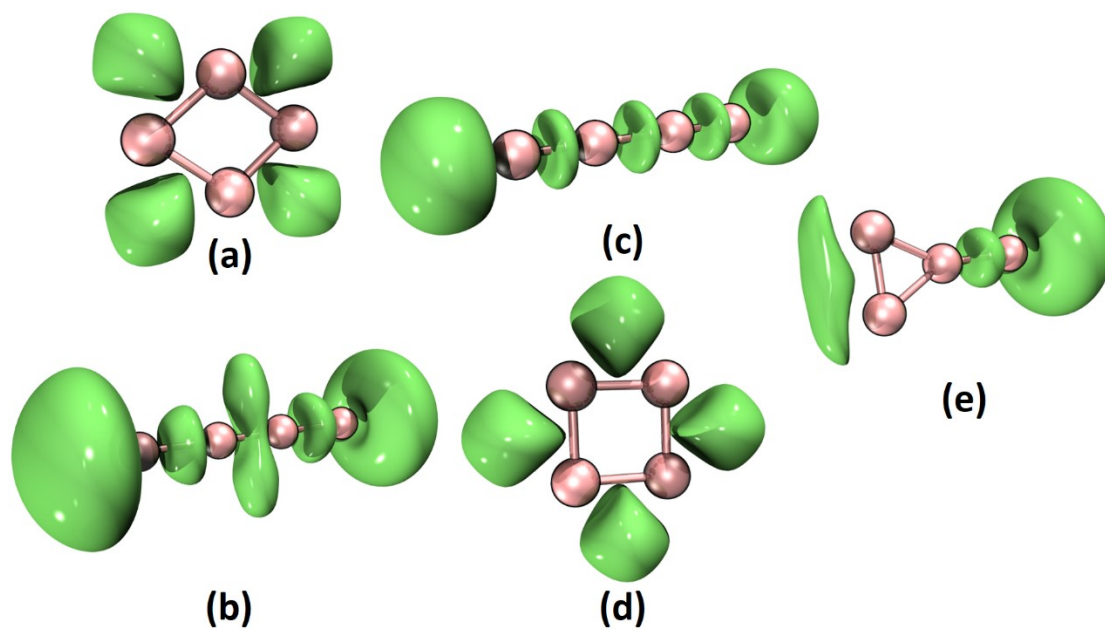

**Figure S1.** ELF diagrams of (a) rhombus isomer **1**, (b) linear isomer **5**, (c) linear isomer **6**, (d) square isomer **2**, and (e) capped triangle isomer **3**. Isovalue = 0.9 au.
